# Supplementary material for: Encapsulation of charge-diffuse peralkylated onium cations in the cavity of cucurbit[7]uril
Source: Royal Society of Chemistry journal article supplement (doi:10.1039/b811823j), 2008-01-01
Supplement: b811823j.pdf [file b811823j.pdf]

© Royal Society of Chemistry

Electronic Supplementary Information

**Encapsulation of charge-diffuse peralkylated onium cations in the cavity of cucurbit[7]uril**

Antony D. St-Jacques, Ian W. Wyman and Donal H. Macartney\*

Department of Chemistry, Queen's University, 90 Bader Lane, Kingston, ON K7L 3N6  
Canada.

Fax: +1 613 533-6669

Tel: +1 613 533 2617

E-mail: donal@chem.queensu.ca

| <b>Contents</b>                                                                                                                                                                        | <b>Page</b> |
|----------------------------------------------------------------------------------------------------------------------------------------------------------------------------------------|-------------|
| General experimental details                                                                                                                                                           | S2          |
| Table S1 Host-guest stability constants ( $K_{CB[7]}$ ) for the inclusion of peralkylated onium cations in CB[7] by competitive $^1\text{H}$ NMR experiments in $\text{D}_2\text{O}$ . | S3          |
| Figure S1 Energy-minimized structure of $\{\text{NMe}_4\cdot\text{CB}[7]\}^+$                                                                                                          | S4          |
| Figure S2 Energy-minimized structure of $\{\text{NEt}_4\cdot\text{CB}[7]\}^+$                                                                                                          | S4          |
| Figure S3 Energy-minimized structure of $\{\text{N}^n\text{Pr}_4\cdot\text{CB}[7]\}^+$                                                                                                 | S5          |
| Figure S4 Energy-minimized structure of $\{\text{N}^n\text{Bu}_4\cdot\text{CB}[7]\}^+$                                                                                                 | S5          |

### General experimental details

The cucurbit[7]uril was prepared and characterized by Day's method,<sup>1</sup> while the cationic guests and competitive guests were used as received (Sigma-Aldrich, Alfa Aesar). The <sup>1</sup>H and <sup>31</sup>P NMR chemical shift titrations and competitive NMR binding experiments (Bruker Avance 400 MHz instrument) were carried out at 25 °C in D<sub>2</sub>O using a 0.050 dm<sup>3</sup> mol<sup>-1</sup> NaOAc/HOAc buffer (pD 4.75) with 1.0 mmol dm<sup>-3</sup> guest and, in the case of the competition experiments (with 1,2-phenylenediammonium ( $K_{\text{CB}[7]} = (8.04 \pm 1.28) \times 10^4 \text{ dm}^3 \text{ mol}^{-1}$ ), 1,4-phenylenediammonium ( $(2.07 \pm 0.33) \times 10^6 \text{ dm}^3 \text{ mol}^{-1}$ ), or 3-trimethylsilylpropionic acid-2,2,3,3-*d*<sub>4</sub> ( $(1.82 \pm 0.22) \times 10^7 \text{ dm}^3 \text{ mol}^{-1}$ )),<sup>2</sup> 1.0 mmol dm<sup>-3</sup> competitor in the presence of a slight deficiency of CB[7] using Isaac's methods for stability constant and error calculations (Table S1).<sup>2</sup> The gas-phase energy-minimization calculations (Fig. S1-S9) were performed using Chem3D Pro 11.0 software (CambridgeSoft).

1. A. Day, A. P. Arnold, R. J. Blanch and B. Snushall, *J. Org. Chem.* 2001, **66**, 8094.
2. S. Liu, C. Ruspic, P. Mukhopadhyay, S. Chakrabarti, P. Y. Zavalij and L. Isaacs, *J. Am. Chem. Soc.* 2005, **127**, 15959.

Table S1. Host-guest stability constants ( $K_{CB[7]}$ ) for the inclusion of peralkylated onium cations in CB[7] by competitive  $^1\text{H}$  NMR experiments in  $\text{D}_2\text{O}$ .

| Guest                                                        | Competitor Guest                       | $K_{CB[7]}$ , $\text{dm}^3 \text{mol}^{-1}$ |
|--------------------------------------------------------------|----------------------------------------|---------------------------------------------|
| $\text{N}(\text{CH}_3)_3^+$                                  | 1,2-phenylenediamine                   | $(1.2 \pm 0.4) \times 10^5$                 |
|                                                              | $\text{P}(\text{CH}_3)_4^+$            | $(1.3 \pm 0.2) \times 10^5$                 |
| $\text{N}(\text{CH}_2\text{CH}_3)_4^+$                       | 1,4-phenylenediamine                   | $(1.0 \pm 0.2) \times 10^6$                 |
|                                                              | $\text{P}(\text{CH}_3)_4^+$            | $(1.3 \pm 0.3) \times 10^6$                 |
|                                                              | $\text{N}(\text{CH}_3)_4^+$            | $(8.8 \pm 1.6) \times 10^5$                 |
| $\text{N}(\text{CH}_2\text{CH}_2\text{CH}_3)_4^+$            | 1,2-phenylenediamine                   | $(9.0 \pm 2.4) \times 10^3$                 |
| $\text{N}(\text{CH}_2\text{CH}_2\text{CH}_2\text{CH}_3)_4^+$ | chemical shift titration               | $(2.8 \pm 0.7) \times 10^3$                 |
| $\text{P}(\text{CH}_3)_4^+$                                  | 1,4-phenylenediamine                   | $(2.2 \pm 0.4) \times 10^6$                 |
| $\text{P}(\text{CH}_2\text{CH}_3)_4^+$                       | 1,4-phenylenediamine                   | $(1.3 \pm 0.3) \times 10^5$                 |
|                                                              | $\text{N}(\text{CH}_2\text{CH}_3)_4^+$ | $(8.3 \pm 1.5) \times 10^4$                 |
|                                                              | $\text{P}(\text{CH}_3)_4^+$            | $(1.1 \pm 0.2) \times 10^5$                 |
| $\text{S}(\text{CH}_3)_3^+$                                  | 1,2-phenylenediamine                   | $(3.4 \pm 0.6) \times 10^4$                 |
|                                                              | $\text{P}(\text{CH}_3)_4^+$            | $(2.9 \pm 0.5) \times 10^4$                 |
| $\text{S}(\text{CH}_2\text{CH}_3)_4^+$                       | 1,4-phenylenediamine                   | $(5.2 \pm 0.9) \times 10^6$                 |
|                                                              | $\text{P}(\text{CH}_2\text{CH}_3)_4^+$ | $(1.3 \pm 0.2) \times 10^7$                 |
|                                                              | $\text{S}(\text{CH}_3)_3^+$            | $(1.2 \pm 0.2) \times 10^7$                 |
| $\text{N}(\text{CH}_3)_3(\text{CH}_2\text{Ph})^+$            | 1,4-phenylenediamine                   | $(2.0 \pm 0.3) \times 10^8$                 |
|                                                              | 3-trimethylsilylpropionic acid         | $(3.0 \pm 0.4) \times 10^8$                 |
|                                                              | $\text{N}(\text{CH}_2\text{CH}_3)_4^+$ | $(2.7 \pm 0.9) \times 10^8$                 |
|                                                              | $\text{P}(\text{CH}_3)_4^+$            | $(1.2 \pm 0.2) \times 10^8$                 |

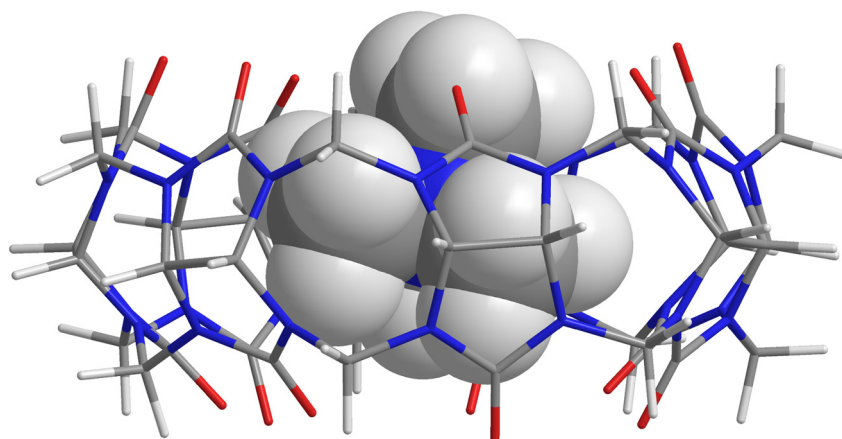

Figure S1 Energy-minimized structure of {NMe<sub>4</sub>•CB[7]}<sup>+</sup> with the CB[7] shown as sticks and the guest as space-filling atoms.

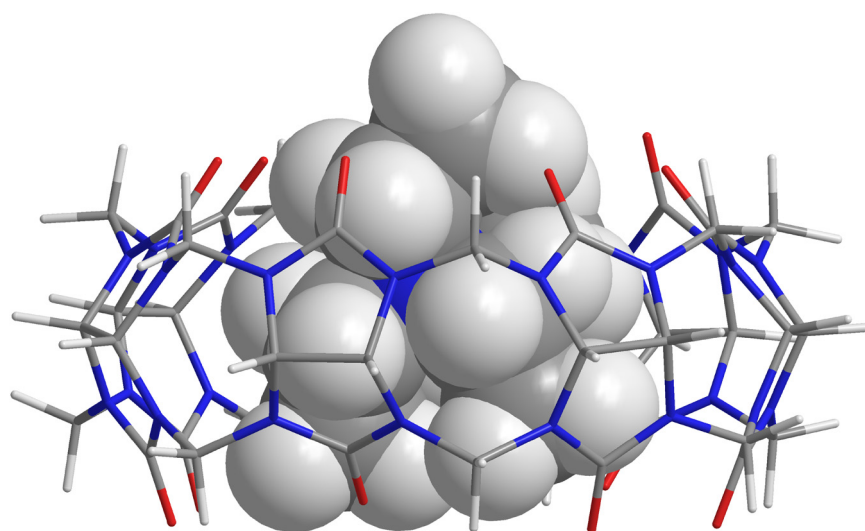

Figure S2 Energy-minimized structure of {NEt<sub>4</sub>•CB[7]}<sup>+</sup> with the CB[7] shown as sticks and the guest as space-filling atoms.

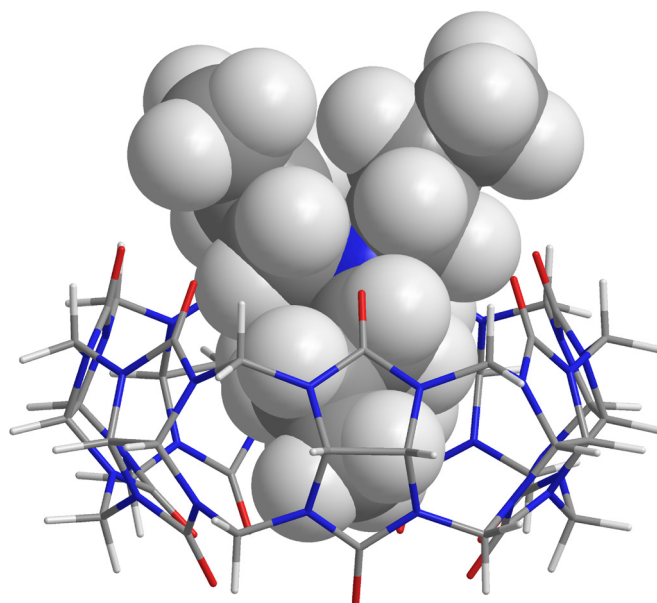

Figure S3 Energy-minimized structure of {N<sup>i</sup>Pr<sub>4</sub>•CB[7]}<sup>+</sup> with the CB[7] shown as sticks and the guest as space-filling atoms.

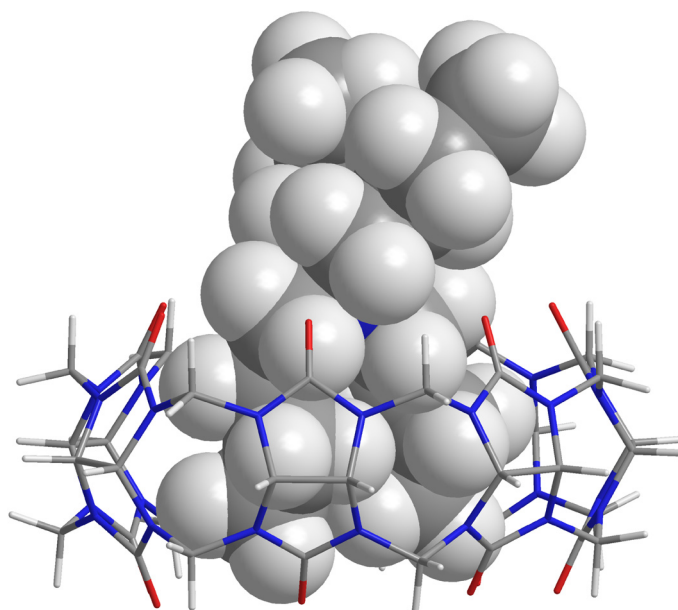

Figure S4 Energy-minimized structure of {N<sup>t</sup>Bu<sub>4</sub>•CB[7]}<sup>+</sup> with the CB[7] shown as sticks and the guest as space-filling atoms.
